# Supplementary material for: Prediction of Overall Survival by Thymidine Kinase 1 Combined with Prostate-Specific Antigen in Men with Prostate Cancer
Source: MDPI journal article supplement (doi:10.3390/ijms24065160), 2023-03-08
Supplement: s1 [file s1]

## Supplementary Materials

**Table S 1**

|                          |      | Age at           | Age at           |                       |          | ng/ml      |                             |                               | ng/ml/cm <sup>3</sup>              | ng/ml/cm <sup>3</sup> | ng/ml           |      |  |
|--------------------------|------|------------------|------------------|-----------------------|----------|------------|-----------------------------|-------------------------------|------------------------------------|-----------------------|-----------------|------|--|
| Time of diagnosis, years |      | Age at screening | Age at diagnosis | Age at last follow-up | Alive, % | PSA, ng/ml | Free/total, cm <sup>3</sup> | Volume, ng/ml/cm <sup>3</sup> | PSA density, ng/ml/cm <sup>3</sup> | TKI*, ng/ml           | Other malign, % |      |  |
| ±1                       | n=65 | 64.5 (5.8)       | 64.9 (5.3)       | 77.2 (10.7)           | 7.7      | 7.5 (16.8) | 0.08 (0.07)                 | 25.6 (12.6)                   | 0.29 (0.54)                        | 0.26 (0.17)           | 52              | 15.4 |  |
| 1-5                      | n=15 | 66.8 (3.6)       | 69.4 (3.3)       | 79.2 (15.8)           | 6.7      | 3.8 (8.0)  | 0.15 (0.12)                 | 19.3 (10.0)                   | 0.13 (0.30)                        | 0.29 (0.14)           | 11              | 13.3 |  |
| 5-10                     | n=37 | 64.4 (5.9)       | 72.4 (6.0)       | 80.4 (11.8)           | 16.2     | 4.6 (4.7)  | 0.14 (0.09)                 | 23.7 (11.0)                   | 0.15 (0.12)                        | 0.25 (0.16)           | 28              | 16.2 |  |
| 10-15                    | n=56 | 63.5 (6.9)       | 75.9 (7.0)       | 84.4 (7.3)            | 21.4     | 3.3 (3.6)  | 0.15 (0.08)                 | 25.2 (13.1)                   | 0.13 (0.10)                        | 0.25 (0.12)           | 31              | 21.4 |  |
| 15-20                    | n=66 | 61.2 (6.7)       | 78.9 (6.4)       | 86.6 (5.4)            | 33.3     | 2.1 (2)    | 0.16 (0.10)                 | 21.4 (9.6)                    | 0.11 (0.09)                        | 0.22 (0.12)           | 34              | 21.2 |  |
| 20-30                    | n=32 | 59.4 (5.5)       | 83.9 (7.0)       | 88.1 (4.2)            | 43.8     | 1.9 (1.4)  | 0.15 (0.08)                 | 22.0 (11.0)                   | 0.09 (0.05)                        | 0.26 (0.16)           | 19              | 12.5 |  |

\*n=175

**Table S 1.** Age composition and baseline data in 271 men with prostate cancer in relation to time of diagnosis during 30 years of follow-up. Median values (IQR). Abbreviations: PSA = prostate specific antigen, TKI = thymidine kinase 1

**Table S 2**

|                                    | With TKI<br>(n = 175) | Without TKI<br>(n = 96) | p     |
|------------------------------------|-----------------------|-------------------------|-------|
| Age                                | 63.4 (5.9)            | 62.9 (8.0)              | 0.169 |
| PSA, ng/ml                         | 3.8 (5.4)             | 2.6 (3.4)               | 0.017 |
| Free/total PSA.                    | 0.13 (0.10)           | 0.12 (0.09)             | 0.110 |
| Prostate volume, cm <sup>3</sup> . | 23.0 (12.0)           | 24.2 (12.2)             | 0.778 |
| PSA density, ng/ml/cm <sup>3</sup> | 0.14 (0.19)           | 0.13 (0.10)             | 0.048 |
| Alive, %                           | 19.4                  | 22.9                    | 0.500 |
| Other malignancies, %.             | 18.3                  | 16.7                    | 0.738 |

**Table S 2.** Baseline data of 275 men with prostate cancer. TKI concentration was measured in 175 men and was missing in 96 men. Mean values (IQR).

Figure S 1.

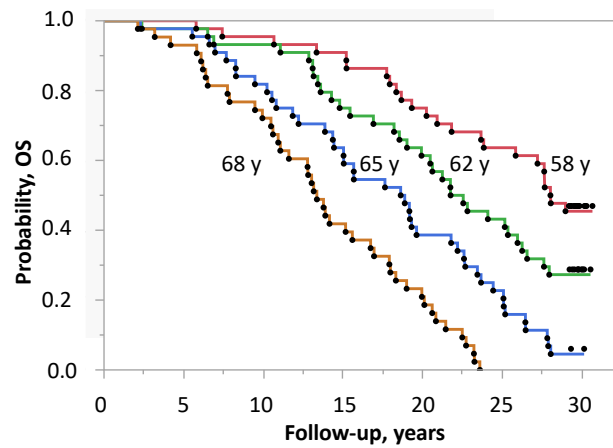

**Figure S 1.** Overall survival of 175 men with prostate cancer stratified by quartiles of age at screening. Kaplan-Meier estimates, median survival (95% CI) 28.0 (23.7-), 22.6 (19.0-26.3), 18.1 (13.9-21.8) and 13.6 (10.9-17.0) years.

Figure S 2.

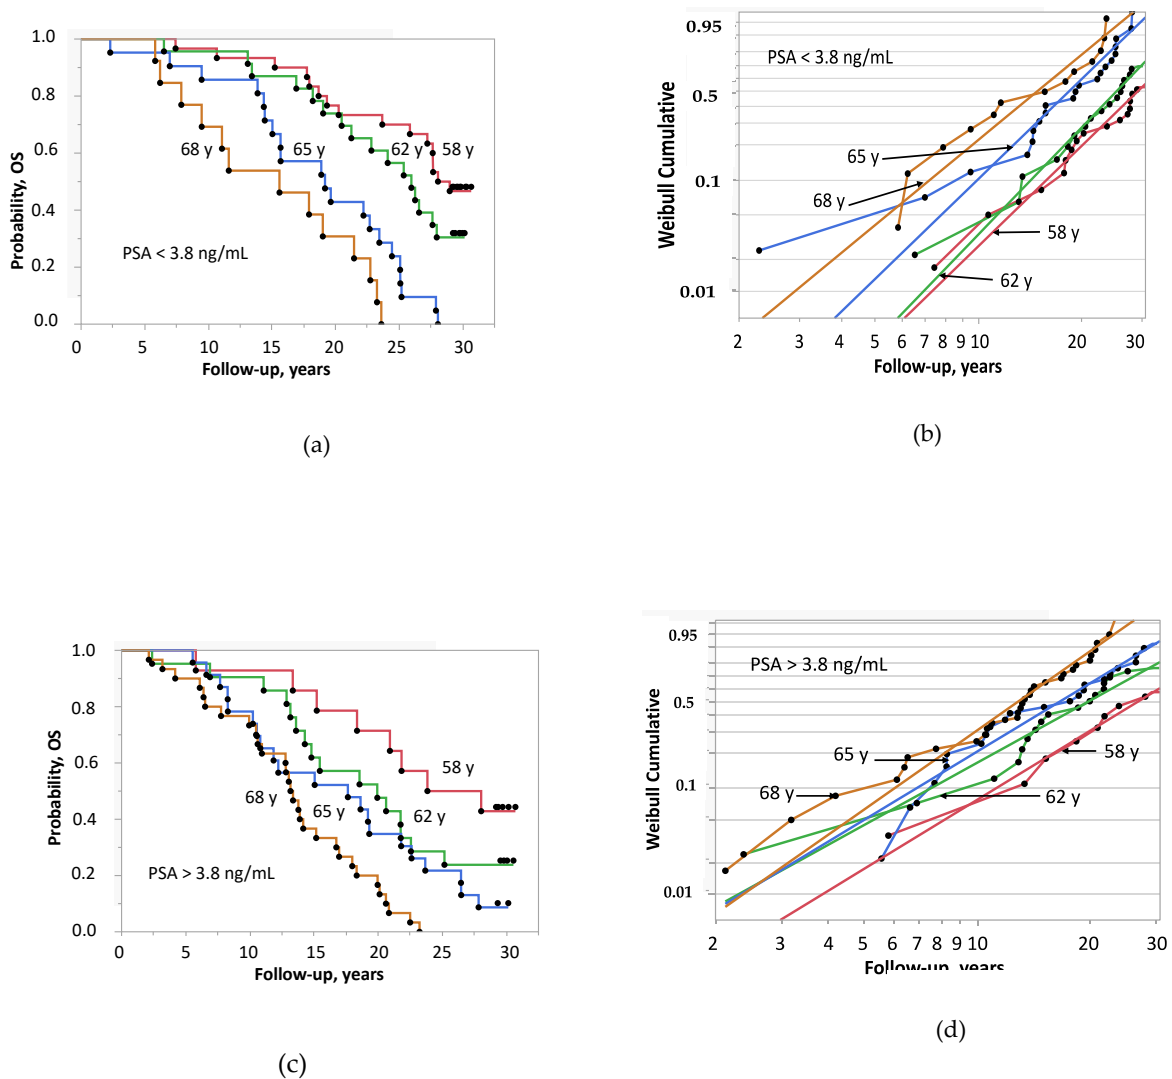

**Figure S 2.** Overall survival of 175 men with prostate cancer stratified by quartiles of age at screening and median PSA concentration: (a) Kaplan-Meier estimates of PSA concentrations <3.8 ng/ml; (b) Weibull transformed Kaplan-Meier estimates of PSA concentrations <3.8 ng/ml; (c) Kaplan-Meier estimates of PSA concentrations >3.8 ng/ml; (d) Weibull transformed Kaplan-Meier estimates of PSA concentrations >3.8 ng/ml

**Table S 3.**

| Age<br>(mean, 95%CI) | TK1 < 0.25, ng/ml<br>(95% CI) | TK1 >0.25, ng/ml<br>(95% CI) | Ratio<br>< 0.25/>0.25 | PSA <3.8<br>(95% CI) | PSA >3.8<br>(95% CI) | Ratio<br><3.8/>3.8 |
|----------------------|-------------------------------|------------------------------|-----------------------|----------------------|----------------------|--------------------|
| 58.1 (57.6-58.5)     | 32.5 (28.9-41.0)              | 30.8 (24.8-42.6)             | 1.06                  | 32.7 (28.2-41.5)     | 31.8 (23.7-53.8)     | 1.03               |
| 61.9 (61.7-62.2)     | 29.6 (25.5-36.7)              | 22.3 (17.9-28.6)             | 1.33                  | 28.2 (24.4-34.1)     | 23.9 (18.6-32.2)     | 1.18               |
| 65.0 (64.7-65.3)     | 23.0 (20.1-26.5)              | 17.4 (14.9-21.3)             | 1.32                  | 20.6 (17.6-24.0)     | 19.7 (15.9-24.5)     | 1.05               |
| 68.3 (68.0-68.7)     | 15.6 (12.8-18.8)              | 15.5 (12.9-18.5)             | 1.01                  | 17.0 (13.2-21.5)     | 14.9 (12.7-17.4)     | 1.14               |

**Table S 3.** Weibull survival probability of TK1 and PSA below and above median concentration and ratio of TK1 <0.25/>0.25 ng/ml and PSA <3.8/>3.8 ng/ml in 175 men with prostate cancer stratified by 4 age groups.

Figure S 3.

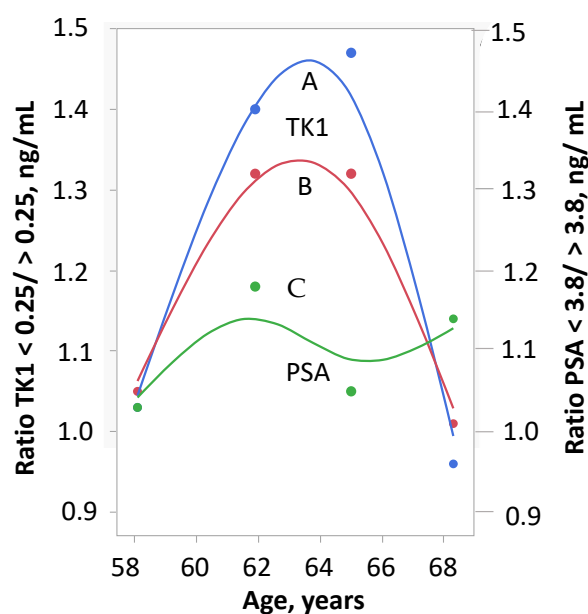

**Figure S 3.** Ratio of TK1 <0.25/>0.25 ng/ml and PSA <3.8/>3.8 ng/ml in 4 age groups of 175 men with prostate cancer. **A:** Median survival of Kaplan-Meier estimates of TK1, **B:** Weibull survival probability of TK1, **C:** Weibull survival probability of PSA.

Figure S 4.

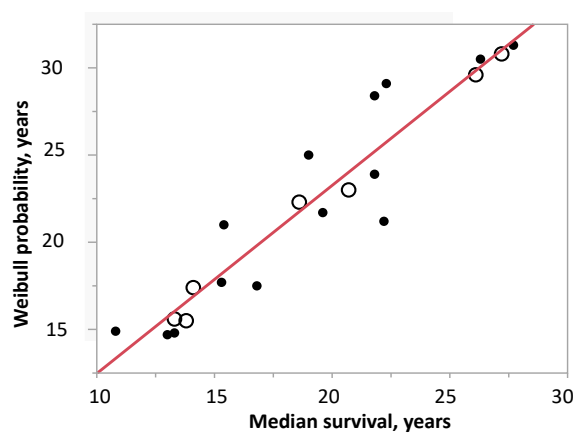

**Figure S 4.** Relationship between median survival time and survival probability calculated from Weibull transformed Kaplan-Meier survival estimates of 175 men with prostate cancer and 30 years of follow-up. Open symbols: subgroups of 14 observations, closed symbols: subgroup of 7 observations.
